# Supplementary material for: Targeting TKI-Activated NFKB2-MIF/CXCLs-CXCR2 Signaling Pathways in FLT3 Mutated Acute Myeloid Leukemia Reduced Blast Viability
Source: MDPI journal article supplement (doi:10.3390/biomedicines10051038), 2022-04-30
Supplement: s1 [file s1]

# Targeting TKI-Activated NFKB2-MIF/CXCLs-CXCR2 Signaling Pathways in FLT3 mutated Acute Myeloid Leukemia Reduced Blast Viability

Huynh Cao<sup>1, 2,†</sup>, Verena Tadros<sup>3,†</sup>, Benjamin Hiramoto<sup>3,†</sup>, Kevin Leeper<sup>3</sup>, Christopher Hino<sup>1</sup>, Jeffrey Xiao<sup>3</sup>, Bryan Pham<sup>1</sup>, Do Hyun Kim<sup>3</sup>, Mark E. Reeves<sup>1, 2</sup>, Chien-Shing Chen<sup>1, 2</sup>, Jiang F. Zhong<sup>4</sup>, Ke K. Zhang<sup>5, 6</sup>, Linglin Xie<sup>5</sup>, Samiksha Wasnik<sup>3</sup>, David J. Baylink<sup>3</sup>, Yi Xu<sup>1, 2, 3\*</sup>

## Supplementary Documents

| List of Reagents                      |                               |            |                |                    |
|---------------------------------------|-------------------------------|------------|----------------|--------------------|
| Antibody/Reagents                     | Abbreviation/Name in the text | Cat. #     | Company        | Species Reactivity |
| <b>Viability Dye eFluor™ 780</b>      | Viability Dye                 | 65-0865-14 | eBioscience    |                    |
| <b>CD13-PE-CY7</b>                    | CD13                          | 301712     | Biolegend      | Human              |
| <b>CD14-APC</b>                       | CD14                          | 325608     | Biolegend      | Human              |
| <b>CD33-PERCP</b>                     | CD33                          | 341640     | BD             | Human              |
| <b>CD33-APC</b>                       | CD33                          | 303408     | Biolegend      | Human              |
| <b>CD33-FITC</b>                      | CD33                          | 366620     | Biolegend      | Human              |
| <b>CD34-PE</b>                        | CD34                          | 348057     | BD Biosciences | Human              |
| <b>CD44-FITC</b>                      | CD44                          | 338804     | Biolegend      | Human              |
| <b>CD44-PE-Cy7</b>                    | CD44                          | 338816     | Biolegend      | Human              |
| <b>CXCR2-PE</b>                       | CXCR2                         | 320705     | Biolegend      | Human              |
| <b>CXCR2-APC</b>                      | CXCR2                         | 320710     | Biolegend      | Human              |
| <b>CXCR2</b>                          | CXCR2                         | 20634-1-AP | Ptglab         | Human              |
| <b>CD117-PERCP</b>                    | CD117                         | 313214     | Biolegend      | Human              |
| <b>Ki-67-PE</b>                       | Ki-67                         | 350504     | Biolegend      | Human              |
| <b>Ki-67-APC</b>                      | Ki-67                         | 350514     | Biolegend      | Human              |
| <b>Ki-67-PERCP</b>                    | Ki-67                         | 350519     | Biolegend      | Human              |
| <b>BrdU-PERCP</b>                     | BrdU                          | 364109     | Biolegend      |                    |
| <b>BrdU (5-bromo-2'-deoxyuridine)</b> | BrdU                          | 142567     | Abcam          |                    |
| <b>IgG1, κ Isotype Ctrl- FITC</b>     |                               | 400107     | Biolegend      |                    |
| <b>IgG1, κ Isotype Ctrl- PE</b>       |                               | 400111     | Biolegend      |                    |

|                                    |                |          |                |       |
|------------------------------------|----------------|----------|----------------|-------|
| <b>IgG1, κ Isotype Ctrl- APC</b>   |                | 400121   | Biologend      |       |
| <b>IgG1, κ Isotype Ctrl- PERCP</b> |                | 400147   | Biologend      |       |
| <b>Gilteritinib (ASP2215)</b>      | GILT           | S7754    | SELLECKCHEM    |       |
| <b>Quizartinib</b>                 | QUIZ           | A10027   | ADOOQ          |       |
| <b>SB225002</b>                    | CXCR2-I        | HY-16711 | MedChemExpress |       |
| <b>BAY11-7082 (BAY11-7821)</b>     | NFKB-I         | S2913    | SELLECKCHEM    |       |
| <b>Recombinant Human MIF</b>       | MIF            | 300-69   | Peprtech       | Human |
| <b>Human XL Cytokine Array Kit</b> | Cytokine Array | ARY002B  | R&D SYSTEMS    | Human |
| <b>siRNA Oligo NFKB2 p100/ p52</b> | siRNA-NFKB2    | SR303162 | Origene        | Human |

**Supplementary Table S1: List of Reagents used in this study.**

| #  | Name (HUMAN)       | Forward Sequence        | Reverse Sequence         |
|----|--------------------|-------------------------|--------------------------|
| 1  | <i>CD44</i>        | CCAGAAGGAACAGTGGTTTGGC  | ACTGTCCTCTGGGCTTGGTGTT   |
| 2  | <i>CD74</i>        | AAGCCTGTGAGCAAGATGCGCA  | AGCAGGTGCATCACATGGTCCT   |
| 3  | <i>CXCR2</i>       | TCCGTCACTGATGTCTACCTGC  | TCCTTCAGGAGTGAGACCACCT   |
| 4  | <i>CXCL1</i>       | AGCTTGCCCTCAATCCTGCATCC | TCCTTCAGGAACAGCCACCAGT   |
| 5  | <i>CXCL5</i>       | CAGACCACGCAAGGAGTTCATC  | TTCCTTCCCGTTCTTCAGGGAG   |
| 6  | <i>CXCL8 (IL8)</i> | GAGAGTGATTGAGAGTGGACCAC | CACAACCCTCTGCACCCAGTTT   |
| 7  | <i>NFKB1</i>       | GCAGCACTACTTCTTGACCACC  | TCTGCTCCTGAGCATTGACGTC   |
| 8  | <i>NFKB2</i>       | GGCAGACCAGTGTCATTGAGCA  | CAGCAGAAAGCTCACCACACTC   |
| 9  | <i>MIF</i>         | AGAACCGCTCCTACAGCAAGCT  | GGAGTTGTTCCAGCCCACATTG   |
| 10 | <i>CYCLIN E1</i>   | TGTGTCCTGGATGTTGACTGCC  | CTCTATGTTCGCACCACTGATACC |
| 11 | <i>CDK4</i>        | CCATCAGCACAGTTCGTGAGGT  | TCAGTTCGGGATGTGGCACAGA   |

**Supplementary Table S2: List of Primers (Origene, etc.) used in this study.**

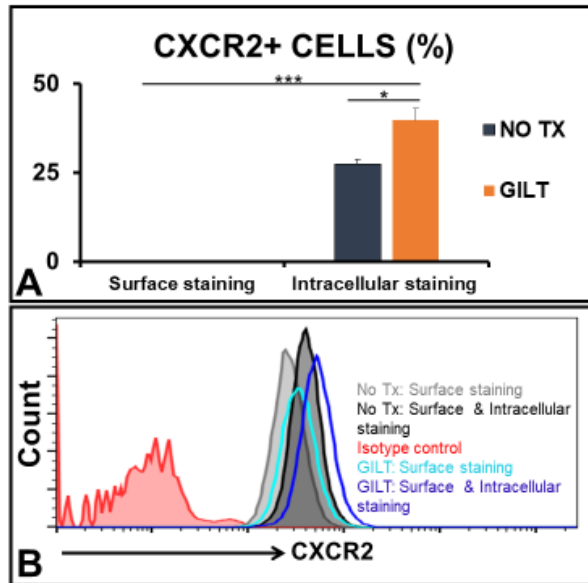

**Supplementary Figure S1. Increased CXCR2 expression in survived GILT-treated MV4-11 cells *in vitro*.**

**A)** Cumulative FC percentage data of viable CXCR2+ MV4-11 cells after 3 days' GILT-treatment, which were analyzed by either surface staining or intracellular staining;

**B)** Representative FC histogram plot of CXCR2 expressions in viable GILT-treated MV4-11 cells *in vitro*;

Briefly, MV4-11 cells were treated with 80nM GILT or without GILT (No Tx) for three days, and then underwent medium change to remove GILT and continuous culture for another week to let survived GILT-treated cells recover. Then GILT-treated cells were collected for FC staining including surface staining and/or intracellular staining to detect CXCR2 expressions. Color curves indicate different staining methods and show increased expressions of CXCR2 in viable GILT-treated MV4-11 cells (light or dark blue curves) when compared to the non-treatment controls (gray or black curves);

\* $P < 0.05$ , \*\*\* $P < 0.005$ .

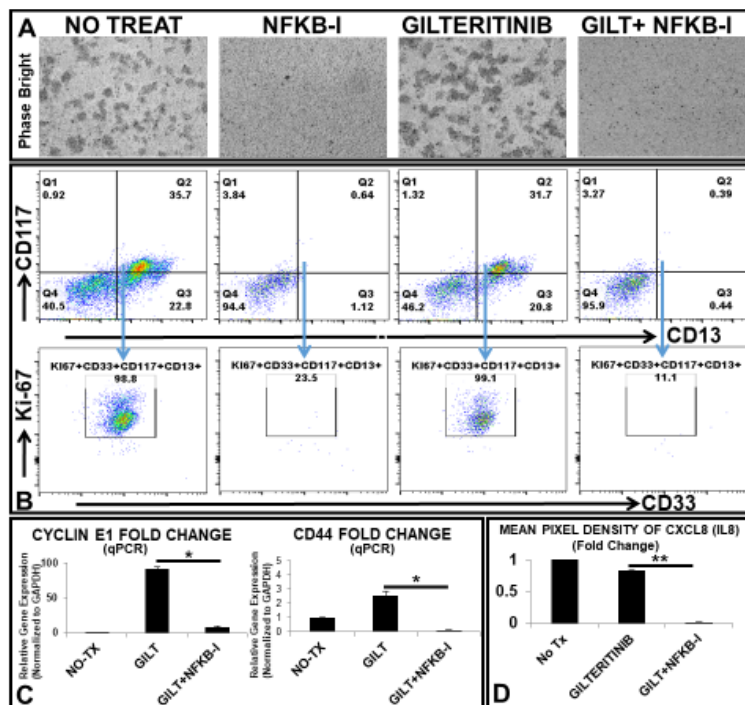

**Supplementary Figure S2. Therapeutic effect of the combination of 80nM GILT and 50uM NFKB-I on a refractory AML-FLT3 BMMNC (Patient #6) *ex vivo*.**

**A)** Representative phase-bright images showing tumorigenic cluster formation in different experimental groups 3 days after the treatment of different TKI drugs *ex vivo*;

**B)** Representative FC plots of viable CD117+CD13+ primary blasts in different treatment groups; Blue arrows (Gating) indicate further analyses of Ki-67 expression of these viable CD117+CD13+ primary blasts;

**C)** 3 days after the treatment *ex vivo*, the cells were collected for RNA isolation and gene expressions were analyzed by qPCR. Data show mRNA expressions of the genes of *CYCLIN E1* and *CD44*;

**D)** Cumulative Mean Pixel Densities (Fold Change) of CXCL8, which were acquired from proteome analyses of cell-free supernatants from treated groups of primary AML BMMNC cells.

\*P<0.05, \*\*P<0.01.
